# Supplementary material for: A retrospective analysis of neoadjuvant chemotherapy in pneumonectomy for locally advanced central non–small cell lung cancer
Source: PeerJ. 2025 Aug 27;13:e20007. doi: 10.7717/peerj.20007 (PMC12398283; doi:10.7717/peerj.20007)
Supplement: Supplemental Information 1 [file peerj-13-20007-s001.xlsx]

## Sheet: sheet1
Gender	Age	Age（group）	Neoadjuvant chemotherapy	Pathological type	Laterality	pT	pN	ypTNM	cT	cN	cTNM	Vessel invasion	Downstaging	Recurrent metastases	Survival	OS	DFS
male	66	2	yes	scc	left	4	2	3	4	2	3	no	no	yes	no	5	3
male	61	2	yes	scc	left	2	2	3	2	2	3	no	no	no	yes	50	50
male	68	2	yes	scc	left	4	2	3	4	2	3	no	no	no	no	8	8
female	60	1	yes	adc	left	2	2	3	2	2	3	yes	no	yes	no	14	10
male	60	1	yes	scc	left	1	2	3	3	2	3	no	no	no	no	38	38
male	53	1	yes	adc	right	2	0	1	3	0	2	yes	yes	no	no	16	16
female	51	1	yes	adc	left	1	2	3	2	2	3	no	no	yes	yes	66	48
male	53	1	yes	scc	left	2	1	2	3	1	3	no	yes	no	yes	60	60
male	61	2	yes	adc	right	1	0	1	3	0	2	no	yes	no	yes	25	25
male	73	2	no	scc	left	4	0	3	4	0	3	no	no	yes	no	14	8
male	68	2	yes	adc	left	4	0	3	4	0	3	no	no	no	yes	36	36
male	63	2	yes	scc	left	1	0	1	2	0	2	no	yes	no	yes	36	36
male	52	1	yes	adc	left	4	2	3	4	2	3	no	no	yes	no	8	5
male	53	1	yes	adc	left	2	1	2	2	1	2	no	no	yes	no	24	20
male	55	1	yes	scc	left	3	2	3	3	2	3	no	no	no	yes	14	14
male	63	2	no	scc	left	3	1	3	3	1	3	no	no	yes	no	15	10
male	65	2	no	adc	left	2	0	2	2	0	2	no	no	yes	no	37	32
male	61	2	yes	scc	left	3	0	2	3	1	3	no	yes	yes	no	22	15
female	52	1	yes	scc	left	2	0	1	3	0	2	no	yes	no	yes	80	80
male	62	2	yes	scc	right	4	2	3	4	2	3	no	no	yes	no	9	6
male	54	1	no	scc	left	4	0	3	4	0	3	no	no	yes	no	15	12
male	43	1	yes	scc	left	4	0	3	4	0	3	no	no	yes	no	10	6
female	52	1	yes	adc	right	2	2	3	2	2	3	no	no	yes	yes	70	60
male	67	2	no	scc	left	3	2	3	3	2	3	no	no	yes	no	8	6
male	56	1	no	adc	left	4	2	3	4	2	3	no	no	yes	no	7	4
male	57	1	no	scc	left	2	1	2	2	1	2	no	no	no	yes	44	44
male	67	2	yes	scc	left	1	2	3	2	2	3	no	no	yes	yes	20	16
male	54	1	yes	scc	right	1	0	1	3	0	2	no	yes	no	yes	27	27
male	58	1	yes	scc	right	2	0	2	2	0	2	no	no	no	no	30	30
male	59	1	no	scc	left	3	2	3	3	2	3	no	no	yes	no	10	7
male	62	2	yes	scc	left	1	0	1	2	0	2	no	yes	no	yes	31	31
male	54	1	no	scc	left	2	2	3	2	2	3	no	no	yes	no	44	32
male	47	1	yes	scc	left	1	0	1	3	0	2	no	yes	yes	yes	49	44
male	55	1	yes	adc	left	4	1	3	4	1	3	no	no	yes	no	15	10
male	60	1	yes	adc	right	4	2	3	4	2	3	no	no	yes	no	11	9
male	73	2	yes	scc	left	1	0	1	2	0	2	no	yes	yes	no	38	38
male	50	1	yes	scc	right	2	0	2	2	0	2	no	no	yes	no	30	24
male	57	1	no	adc	left	2	2	3	2	2	3	no	no	yes	no	14	10
female	43	1	yes	adc	left	1	2	3	3	2	3	no	no	yes	no	38	25
male	59	1	yes	scc	left	3	2	3	3	2	3	no	no	yes	no	11	8
male	56	1	yes	scc	left	2	0	2	2	0	2	no	no	no	yes	21	21
female	61	2	yes	adc	left	2	2	3	2	2	3	no	no	yes	yes	21	18
male	44	1	no	adc	right	2	2	3	2	2	3	no	no	no	yes	16	16
male	69	2	no	scc	left	2	0	2	2	0	2	no	no	yes	no	20	14
male	55	1	no	scc	right	2	2	3	2	2	3	no	no	yes	no	10	6
male	62	2	no	scc	left	3	2	3	3	2	3	no	no	yes	no	14	10
male	66	2	no	adc	left	4	2	3	4	2	3	yes	no	yes	no	10	7
male	59	1	no	scc	left	2	0	2	2	0	2	no	no	no	yes	81	81
male	66	2	yes	scc	left	1	2	3	4	2	3	no	no	yes	no	22	16
male	61	2	no	scc	left	2	2	3	2	2	3	no	no	yes	no	26	20
male	55	1	no	adc	left	3	0	2	3	0	2	no	no	no	yes	36	36
female	50	1	yes	adc	left	1	2	3	3	2	3	no	no	yes	no	30	22
male	57	1	yes	scc	left	1	1	2	2	1	2	no	no	no	yes	48	48
male	64	2	yes	scc	right	1	2	3	4	2	3	no	no	yes	no	18	14
male	71	2	no	scc	left	3	0	2	3	0	2	yes	no	no	yes	14	14
male	57	1	no	scc	left	3	1	3	3	1	3	no	no	yes	no	43	30
male	55	1	yes	adc	left	4	2	3	4	2	3	no	no	yes	no	12	8
female	55	1	no	scc	left	2	0	2	2	0	2	no	no	no	yes	45	45
male	55	1	yes	scc	right	4	0	3	4	0	3	no	no	yes	no	18	12
male	70	2	yes	scc	right	1	1	2	2	1	2	no	no	yes	no	40	34
male	47	1	no	adc	left	2	1	2	2	1	2	yes	no	yes	no	20	15
male	57	1	no	scc	left	2	1	2	2	1	2	yes	no	no	no	10	10
male	31	1	yes	adc	right	1	2	3	2	2	3	no	no	yes	yes	72	60
male	61	2	yes	scc	left	1	1	2	2	1	2	no	no	yes	yes	80	62
male	55	1	yes	scc	left	4	1	3	4	1	3	no	no	yes	no	24	20
male	63	2	yes	adc	left	4	0	3	4	0	3	no	no	no	yes	22	22
male	60	1	yes	scc	left	1	0	1	3	0	2	no	yes	yes	no	40	35
male	64	2	no	scc	left	3	0	2	3	0	2	no	no	no	yes	41	41
male	55	1	yes	scc	right	2	2	3	2	2	3	no	no	yes	no	33	20
male	55	1	yes	scc	left	1	0	1	3	0	2	no	yes	yes	no	56	48
male	48	1	yes	scc	left	1	0	1	3	0	2	no	yes	no	yes	63	63
male	53	1	yes	scc	right	1	0	1	3	0	2	no	yes	yes	yes	74	62
male	63	2	no	scc	left	3	0	2	3	0	2	no	no	yes	no	30	24
male	60	1	yes	scc	left	4	0	3	4	0	3	no	no	yes	no	10	6
male	67	2	no	scc	right	4	2	3	4	2	3	no	no	yes	no	12	6
male	64	2	yes	scc	left	1	0	1	3	0	2	no	yes	no	yes	70	70
male	63	2	no	scc	left	2	0	2	2	0	2	no	no	yes	no	58	50
male	53	1	no	scc	left	2	2	3	2	2	3	no	no	yes	yes	49	38
male	69	2	yes	adc	left	2	2	3	2	2	3	no	no	yes	no	40	31
male	70	2	yes	scc	left	4	2	3	4	2	3	no	no	yes	no	9	5
male	59	1	yes	scc	left	1	2	3	3	2	3	no	no	no	yes	18	18
male	67	2	yes	adc	left	1	0	1	3	0	2	no	yes	no	yes	17	17
male	54	1	yes	scc	right	1	2	3	3	2	3	no	no	yes	no	40	34
male	56	1	yes	scc	left	3	0	2	3	1	3	no	yes	yes	no	42	36
male	56	1	no	scc	left	2	0	2	2	0	2	no	no	yes	yes	52	48
male	64	2	yes	scc	left	1	0	1	3	0	2	no	yes	no	yes	73	73
male	62	2	yes	scc	left	1	1	2	3	1	3	no	yes	no	yes	14	14
male	50	1	no	adc	right	4	2	3	4	2	3	no	no	yes	no	14	10
male	70	2	yes	scc	left	2	2	3	2	2	3	no	no	yes	yes	22	16
female	63	2	yes	adc	left	1	2	3	3	2	3	no	no	yes	yes	31	26
male	68	2	no	scc	left	2	0	2	2	0	2	no	no	no	yes	36	36
male	64	2	yes	scc	left	4	0	3	4	0	3	no	no	yes	no	20	14
male	56	1	no	adc	left	4	2	3	4	2	3	no	no	yes	no	16	12
male	52	1	yes	scc	left	1	2	3	3	2	3	no	no	yes	no	55	47
male	54	1	yes	scc	left	1	2	3	3	2	3	no	no	yes	no	32	26
male	62	2	yes	scc	left	2	2	3	2	2	3	no	no	yes	no	20	15
female	71	2	no	adc	left	2	2	3	2	2	3	no	no	yes	no	12	8
male	53	1	no	scc	left	2	2	3	2	2	3	no	no	yes	no	18	12
female	57	1	yes	adc	left	1	2	3	2	2	3	no	no	no	yes	15	15
male	48	1	yes	scc	left	4	0	3	4	0	3	no	no	no	yes	16	16
male	52	1	no	adc	right	4	0	3	4	0	3	no	no	yes	no	9	6
male	54	1	yes	scc	right	2	2	3	2	2	3	no	no	yes	no	55	42
male	52	1	yes	scc	left	2	2	3	2	2	3	no	no	yes	no	20	16
male	56	1	yes	scc	right	1	0	1	3	0	2	no	yes	no	yes	40	40
